# Supplementary material for: Impact of Na2MoO4 nanolayers autogenously formed on tunnel-type Na0.44MnO2
Source: Royal Society of Chemistry journal article supplement (doi:10.1039/c9ta03844b), 2019-01-01
Supplement: c9ta03844b1.pdf [file c9ta03844b1.pdf]

Electronic Supplementary Material (ESI) for Journal of Materials Chemistry A.  
This journal is © The Royal Society of Chemistry 2018

## Supplementary Information

# Impact of $\text{Na}_2\text{MoO}_4$ nanolayers autogenously formed on tunnel-type $\text{Na}_{0.44}\text{MnO}_2$

Ji Ung Choi<sup>a,‡</sup>, Jae Hyeon Jo<sup>a,‡</sup>, Chang-Heum Jo<sup>a</sup>, Min Kyoung Cho<sup>a</sup>, Yun Ji Park<sup>a</sup>, Yongcheng Jin<sup>\*b,c</sup>, Hitoshi Yashiro<sup>d</sup>, and Seung-Taek Myung<sup>\*,a</sup>

<sup>a</sup>*Department of Nanotechnology and Advanced Materials Engineering & Sejong Battery Institute, Sejong University, Seoul 05006, South Korea*

<sup>b</sup>*Interphase Technology for Energy Materials Group, Qingdao Institute of Bioenergy and Bioprocess Technology, Chinese Academy of Sciences, No.189 Songling Road, Laoshan District, Qingdao, Shandong 266-101, P. R. China*

<sup>c</sup>*School of Materials Science and Engineering, Ocean University of China, 238, Songling Road, Qingdao, 266100, P. R. China*

<sup>d</sup>*Department of Chemical Engineering, Iwate University, Iwate 020-8551, Japan*

---

\*Corresponding author

E-mail: [jinyuc@qibebt.ac.cn](mailto:jinyuc@qibebt.ac.cn) (Y. Jin), [smyung@sejong.ac.kr](mailto:smyung@sejong.ac.kr) (S. Myung)

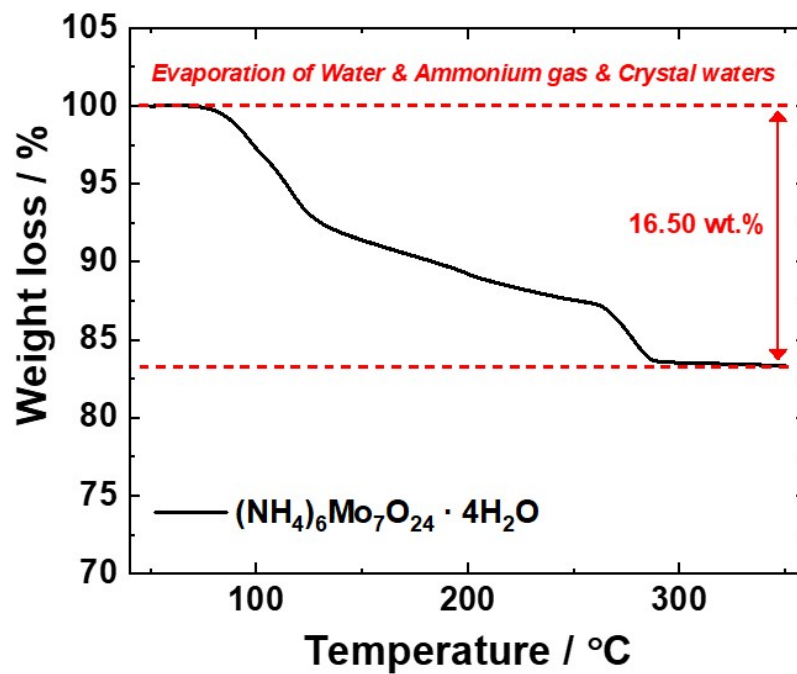

**Fig. S1.** Thermogravimetric analysis (TGA) curve of  $(\text{NH}_4)_6\text{Mo}_7\text{O}_{24} \cdot 4\text{H}_2\text{O}$ .

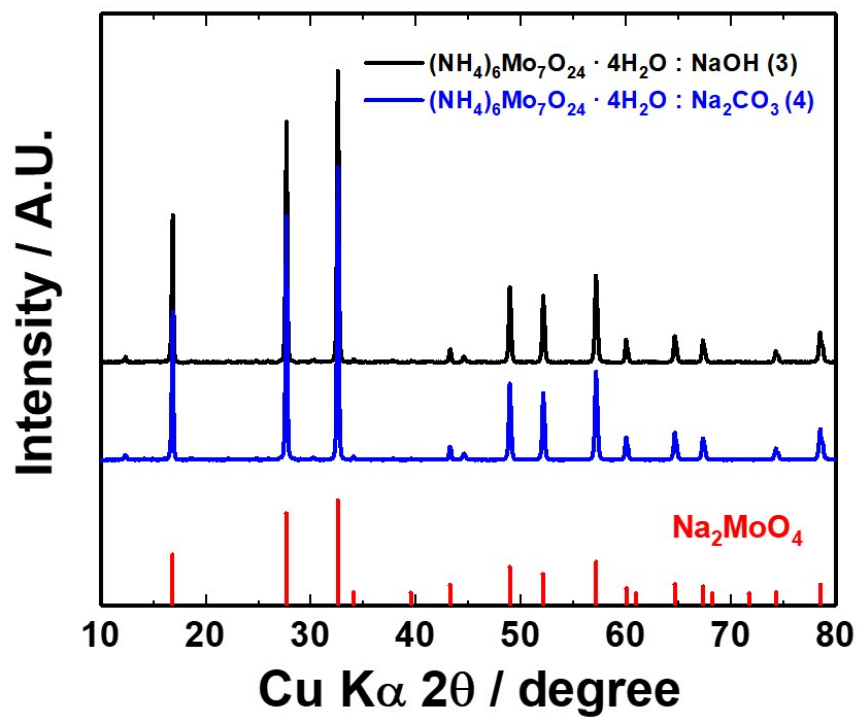

**Fig. S2.** XRD patterns of  $\text{Na}_2\text{MoO}_4$  produced in simulated environment obtained at 350 °C for 5 h in air: (top)  $\text{NaOH} + (\text{NH}_4)_6\text{Mo}_7\text{O}_{24} \cdot 4\text{H}_2\text{O}$  and (bottom)  $\text{Na}_2\text{CO}_3 + (\text{NH}_4)_6\text{Mo}_7\text{O}_{24} \cdot 4\text{H}_2\text{O}$ .

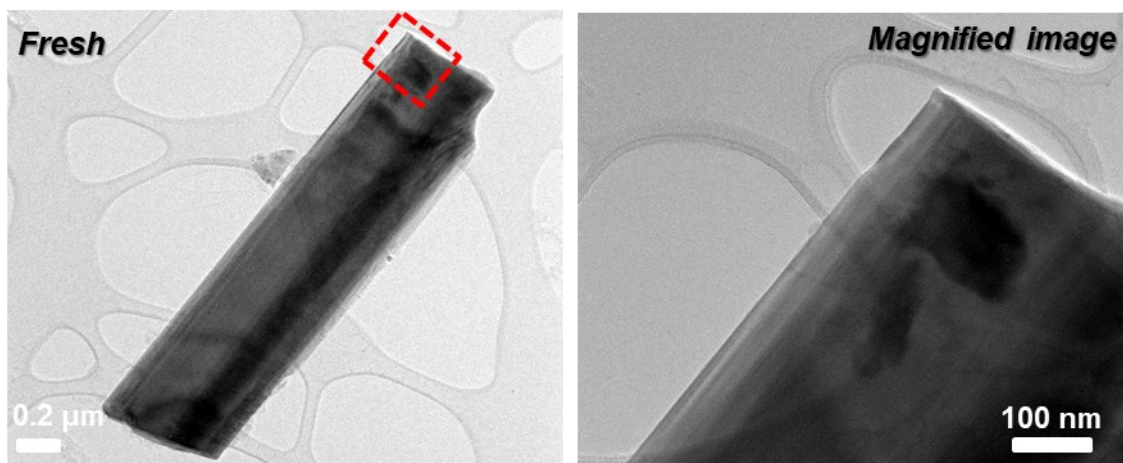

**Fig. S3.** Bright-field TEM images of the as-synthesized  $\text{Na}_{0.44}\text{MnO}_2$  powders.

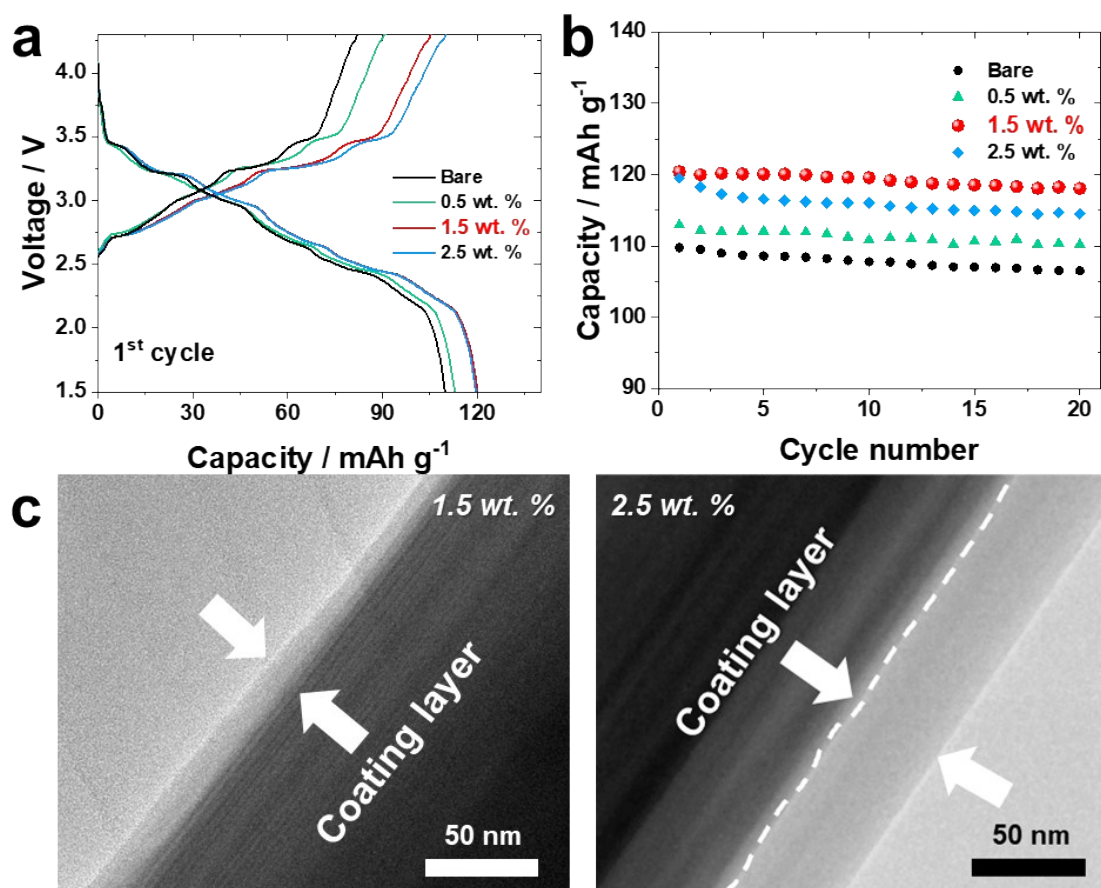

**Fig. S4.** (a) Charge-discharge curves and (b) cyclability of  $\text{Na}_{0.44}\text{MnO}_2$  with different amount of  $\text{Na}_2\text{MoO}_3$  coating medium; (c) bright-field TEM images of the 1.5 wt. % and 2.5 wt. %  $\text{Na}_2\text{MoO}_3$ -coated  $\text{Na}_{0.44}\text{MnO}_2$  powders.

**Table S1.** Rietveld refinement results of XRD data for bare and Na<sub>2</sub>MoO<sub>3</sub>-coated Na<sub>0.44</sub>MnO<sub>2</sub> compounds.

| Formula        |                    | Na <sub>0.44</sub> MnO <sub>2</sub> (Na <sub>4</sub> Mn <sub>9</sub> O <sub>18</sub> ) |                    |                            |                                              |
|----------------|--------------------|----------------------------------------------------------------------------------------|--------------------|----------------------------|----------------------------------------------|
| Crystal system |                    | Orthorhombic                                                                           |                    |                            |                                              |
| Space group    |                    | <i>Pbam</i>                                                                            |                    |                            |                                              |
| Atom           | <i>x</i>           | <i>y</i>                                                                               | <i>z</i>           | <i>g</i>                   |                                              |
| Na1            | 0.2064             | 0.4155                                                                                 | 0.5                | 0.5                        |                                              |
| Na2            | 0.1269             | 0.0051                                                                                 | 0                  | 0.5                        |                                              |
| Na3            | 0.2077             | 0.2051                                                                                 | 0                  | 0.5                        |                                              |
| Mn1            | 0.3572             | 0.3061                                                                                 | 0.5                | 0.5                        |                                              |
| Mn2            | 0.0142             | 0.1081                                                                                 | 0                  | 0.5                        |                                              |
| Mn3            | 0.0314             | 0.3066                                                                                 | 0                  | 0.5                        |                                              |
| Mn4            | 0.3618             | 0.0903                                                                                 | 0.5                | 0.5                        |                                              |
| Mn5            | 0                  | 0.5                                                                                    | 0                  | 0.25                       |                                              |
| O1             | 0.3631             | 0.0049                                                                                 | 0.5                | 0.5                        |                                              |
| O2             | 0.2223             | 0.0933                                                                                 | 0                  | 0.5                        |                                              |
| O3             | 0.0496             | 0.1610                                                                                 | 0.5                | 0.5                        |                                              |
| O4             | 0.4181             | 0.1641                                                                                 | 0.5                | 0.5                        |                                              |
| O5             | 0.1621             | 0.2833                                                                                 | 0.5                | 0.5                        |                                              |
| O6             | 0.4100             | 0.2632                                                                                 | 0                  | 0.5                        |                                              |
| O7             | 0.3150             | 0.3562                                                                                 | 0                  | 0.2423                     |                                              |
| O8             | 0.4999             | 0.0754                                                                                 | 0                  | 0.7084                     |                                              |
| O9             | 0.4688             | 0.4354                                                                                 | 0.5                | 0.7053                     |                                              |
| Sample         | <i>a</i> -axis / Å | <i>b</i> -axis / Å                                                                     | <i>c</i> -axis / Å | <i>R</i> <sub>wp</sub> / % | Electrical conductivity / S cm <sup>-1</sup> |
| Bare           | 9.0976(9)          | 26.4431(6)                                                                             | 2.8246(9)          | 8.5%                       | 2 × 10 <sup>-6</sup>                         |
| Coated         | 9.0920(7)          | 26.4452(1)                                                                             | 2.8242(2)          | 8.8%                       | 8 × 10 <sup>-5</sup>                         |

**Table S2.** Residual  $\text{Na}_2\text{CO}_3$  and  $\text{NaOH}$  contents of bare and  $\text{Na}_2\text{MoO}_4$ -coated  $\text{Na}_{0.44}\text{MnO}_2$  samples from Warder titration.

| $\text{Na}_{0.44}\text{MnO}_2$ | pH    | $\text{Na}_2\text{CO}_3$ [ppm] | $\text{NaOH}$ [ppm] | Total [ppm] |
|--------------------------------|-------|--------------------------------|---------------------|-------------|
| Bare                           | 11.37 | 9,850                          | 7,840               | 17,690      |
| Coated                         | 11.01 | 5,616                          | 4,900               | 10,516      |

**Table S3.** HF titration results for extensively cycled bare and Na<sub>2</sub>MoO<sub>4</sub>-coated Na<sub>0.44</sub>MnO<sub>2</sub> cathode tested in Na cells.

| <b>Na<sub>0.44</sub>MnO<sub>2</sub></b> | <b>HF [ppm]</b> |
|-----------------------------------------|-----------------|
| Bare                                    | 192             |
| Coated                                  | 82              |



**Table S4.** Comparison of electrode performance for several tunnel-structured cathode materials.

| Tunnel-type material                                                                                    | Voltage        | Current density            | 1 <sup>st</sup> discharge capacity | Capacity retention           | Rate capability                                                | ref |
|---------------------------------------------------------------------------------------------------------|----------------|----------------------------|------------------------------------|------------------------------|----------------------------------------------------------------|-----|
| Bare<br>Na <sub>0.44</sub> MnO <sub>2</sub><br>( <i>This work</i> )                                     | 1.5 - 4.3<br>V | 12<br>mA g <sup>-1</sup>   | 110<br>mAh g <sup>-1</sup>         | 72 %<br>over 200<br>cycles   | 1 %<br>(7.2 A g <sup>-1</sup> /<br>12mA g <sup>-1</sup> )      | -   |
| Na <sub>2</sub> MoO <sub>4</sub> -coated<br>Na <sub>0.44</sub> MnO <sub>2</sub><br>( <i>This work</i> ) | 1.5 - 4.3<br>V | 12<br>mA g <sup>-1</sup>   | 120<br>mAh g <sup>-1</sup>         | 86 %<br>over 200<br>cycles   | 67 %<br>(7.2 A g <sup>-1</sup> /<br>12mA g <sup>-1</sup> )     | -   |
| Na <sub>0.44</sub> MnO <sub>2</sub>                                                                     | 2.0 - 3.8<br>V | 12.1<br>mA g <sup>-1</sup> | 107<br>mAh g <sup>-1</sup>         | 100 %<br>over 20<br>cycles   | 84 %<br>(1.21 A g <sup>-1</sup> /<br>12.1 mA g <sup>-1</sup> ) | 1   |
| Na <sub>0.44</sub> MnO <sub>2</sub>                                                                     | 2.0 - 4.0<br>V | 60<br>mA g <sup>-1</sup>   | 108<br>mAh g <sup>-1</sup>         | 97.8 %<br>over 100<br>cycles | 86 %<br>(1.2 A g <sup>-1</sup> /<br>12 mA g <sup>-1</sup> )    | 2   |
| Na <sub>0.44</sub> MnO <sub>2</sub>                                                                     | 2.0 - 4.2<br>V | 60<br>mA g <sup>-1</sup>   | 112<br>mAh g <sup>-1</sup>         | 98 %<br>over 100<br>cycles   | 73 %<br>(6.0 A g <sup>-1</sup> /<br>12 mA g <sup>-1</sup> )    | 4   |
| Na <sub>0.44</sub> MnO <sub>2</sub>                                                                     | 1.5 - 4.0<br>V | 24.2<br>mA g <sup>-1</sup> | 118<br>mAh g <sup>-1</sup>         | 100 %<br>over 150<br>cycles  | 93 %<br>(1.21 A g <sup>-1</sup> /<br>24.2 mA g <sup>-1</sup> ) | 6   |
| Na <sub>0.44</sub> [Mn <sub>0.44</sub> Ti <sub>0.56</sub> ]O <sub>2</sub>                               | 1.5 - 3.9<br>V | 12<br>mA g <sup>-1</sup>   | 110<br>mAh g <sup>-1</sup>         | 90 %<br>over 100<br>cycles   | -                                                              | 33  |
| Na <sub>0.61</sub> Ti <sub>0.48</sub> Mn <sub>0.52</sub> O <sub>2</sub>                                 | 1.5 - 4.0<br>V | 20<br>mA g <sup>-1</sup>   | 86<br>mAh g <sup>-1</sup>          | 81 %<br>over 100<br>cycles   | 36 %<br>(500 mA g <sup>-1</sup> /<br>20 mA g <sup>-1</sup> )   | 44  |
| Na <sub>0.61</sub> [Mn <sub>0.27</sub> Fe <sub>0.34</sub> Ti <sub>0.39</sub> ]O <sub>2</sub>            | 2.6 - 4.2<br>V | 8<br>mA g <sup>-1</sup>    | 70<br>mAh g <sup>-1</sup>          | 90 %<br>over 100<br>cycles   | 42 %<br>(400 mA g <sup>-1</sup> /<br>20 mA g <sup>-1</sup> )   | 45  |
